# Supplementary material
Source: MDPI journal article supplement (https://www.mdpi.com/1424-8247/16/12/1705)
Supplement: s1 [file s1]

## Supplemental Material

SIOC-XJC-SF02, 2-[4-[4-(2-Fluorosulfonyl-vinyl)-benzoyl]-phenoxy]-2-methyl-propionic acid isopropyl ester (C<sub>22</sub>H<sub>23</sub>FO<sub>6</sub>S), was provided by Shanghai Institute of Organic Chemistry, Chinese Academy of Sciences. The following are the spectral results:

White solid, m. p.: 103-105 °C, 81% yield. <sup>1</sup>H NMR (400 MHz, CDCl<sub>3</sub>) δ 7.87 (d, J = 15.6 Hz, 1H), 7.82 (d, J = 8.1 Hz, 2H), 7.76 (d, J = 8.7 Hz, 2H), 7.70 (d, J = 8.1 Hz, 2H), 7.07 (dd, J = 15.6 Hz, 2.0 Hz, 1H), 6.89 (d, J = 8.7 Hz, 2H), 5.10 (hept, J = 6.1 Hz, 1H), 1.68 (s, 6H), 1.22 (d, J = 6.2 Hz, 6H). <sup>19</sup>F NMR (376 MHz, CDCl<sub>3</sub>) δ 62.1 (s, 1F). <sup>13</sup>C NMR (100 MHz, CDCl<sub>3</sub>) δ 193.9, 172.8, 159.9, 147.3 (d, J = 2.5 Hz), 141.3, 133.7, 131.9, 130.2, 129.6, 128.7, 119.8 (d, J = 28.4 Hz), 117.2, 79.3, 69.2, 25.2, 21.3. HRMS (ESI): Calculated for C<sub>22</sub>H<sub>24</sub>FO<sub>6</sub>S<sup>+</sup> [M+H]<sup>+</sup>: 435.1272. Found: 435.1268. Infrared spectrum IR (KBr): 2985, 1730, 1656, 1598, 1408, 1282, 1206, 1102, 975, 930, 873, 764, 628, 557 cm<sup>-1</sup> (Figure S1, S2 and S3).

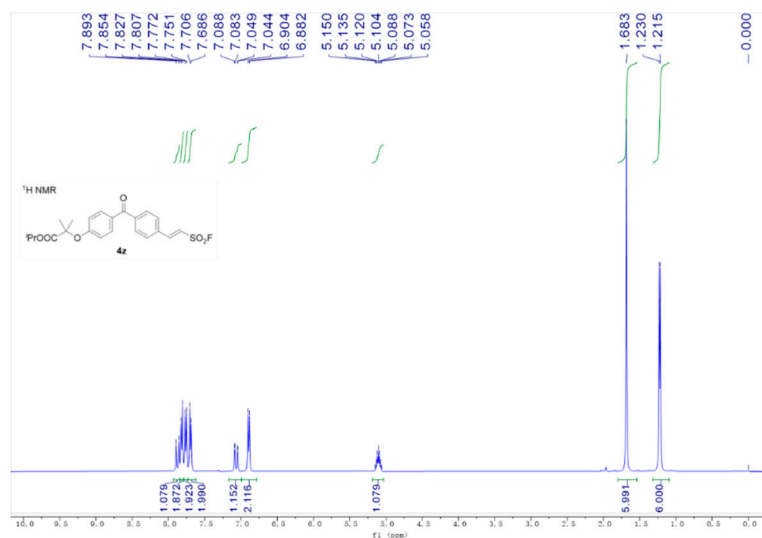

**Figure S1.** <sup>1</sup>H NMR spectrum (400 MHz, CDCl<sub>3</sub>) of SIOC-XJC-SF02.

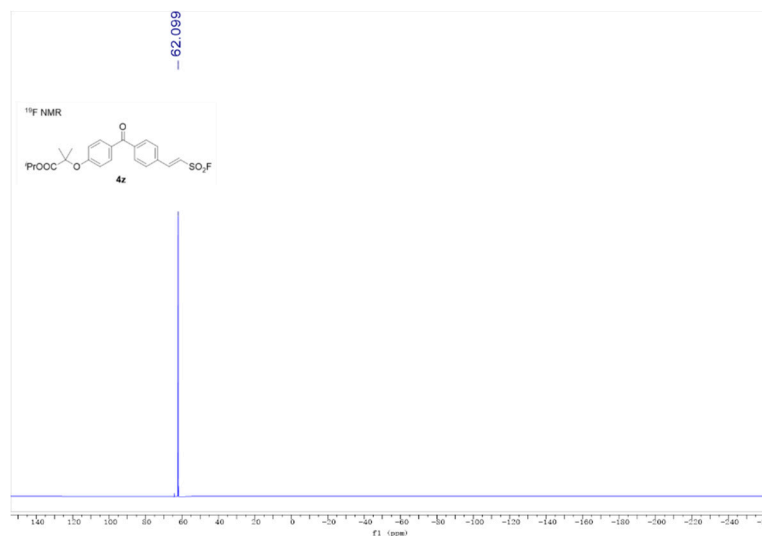

**Figure S2.** <sup>19</sup>F NMR spectrum (376 MHz, CDCl<sub>3</sub>) of SIOC-XJC-SF02.

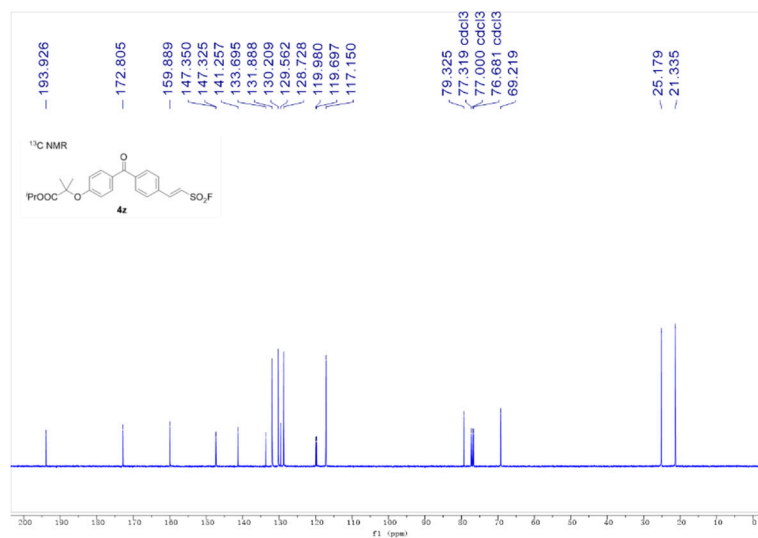

**Figure S3.** <sup>13</sup>C NMR spectrum (100 MHz, CDCl<sub>3</sub>) of SIOC-XJC-SF02.
